# Supplementary material for: Architecture of the ESCPE-1 membrane coat
Source: PubMed Central journal article supplement (PMC10352136; doi:10.1038/s41594-023-01014-7), 2023-06-15

Figure 2a

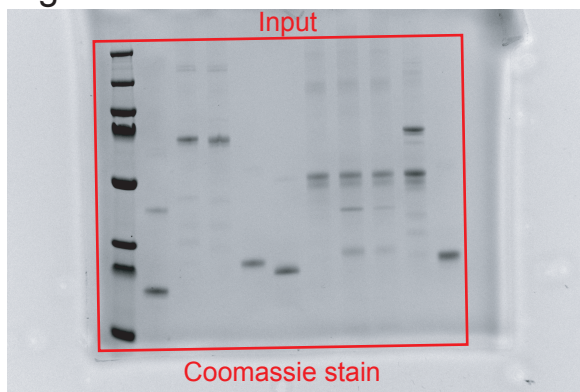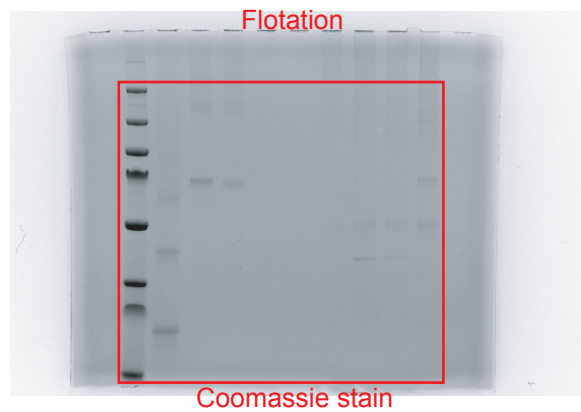

Figure 2b SNX5

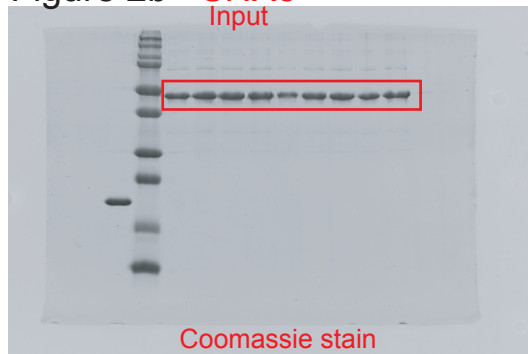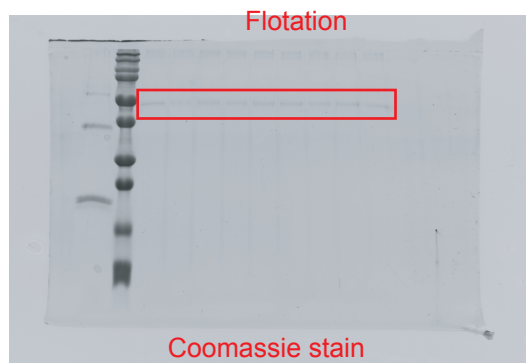

Figure 2b SNX1

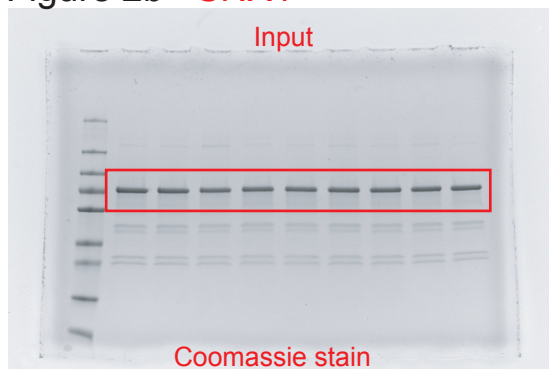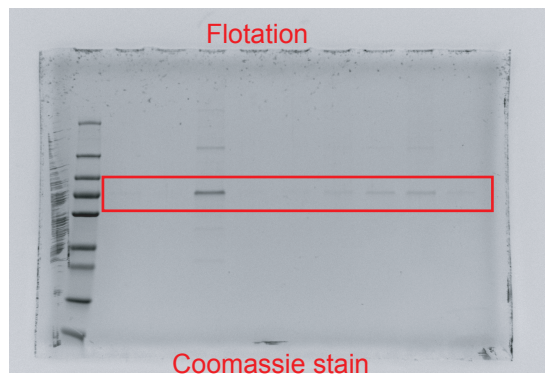

Figure 2b SNX1 PX domain

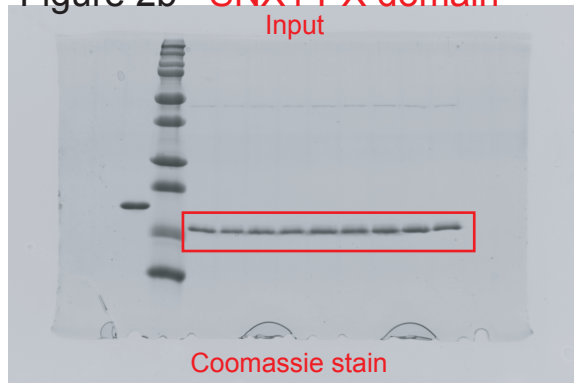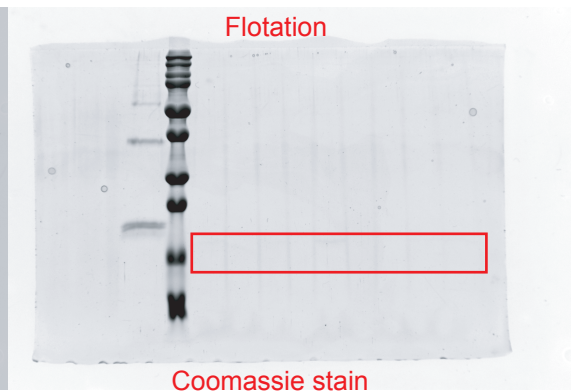

Figure 2c

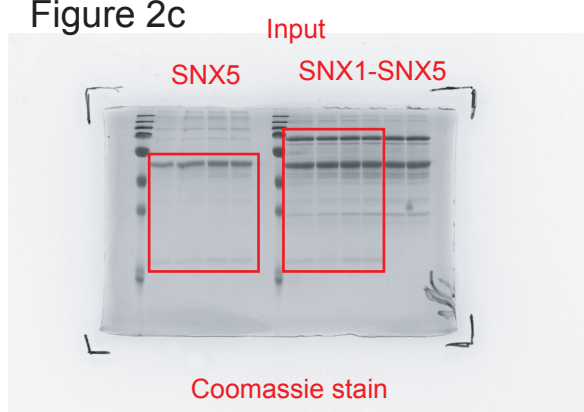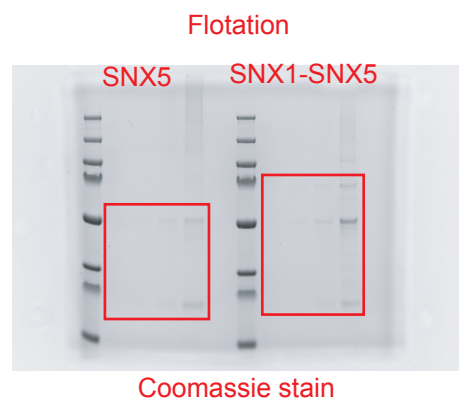

Supplement: 41594_2023_1014_MOESM7_ESM.pdf [file 41594_2023_1014_MOESM7_ESM.pdf]
