# Supplementary material for: Architecture of the ESCPE-1 membrane coat
Source: PubMed Central journal article supplement (PMC10352136; doi:10.1038/s41594-023-01014-7), 2023-06-15

Figure 5a

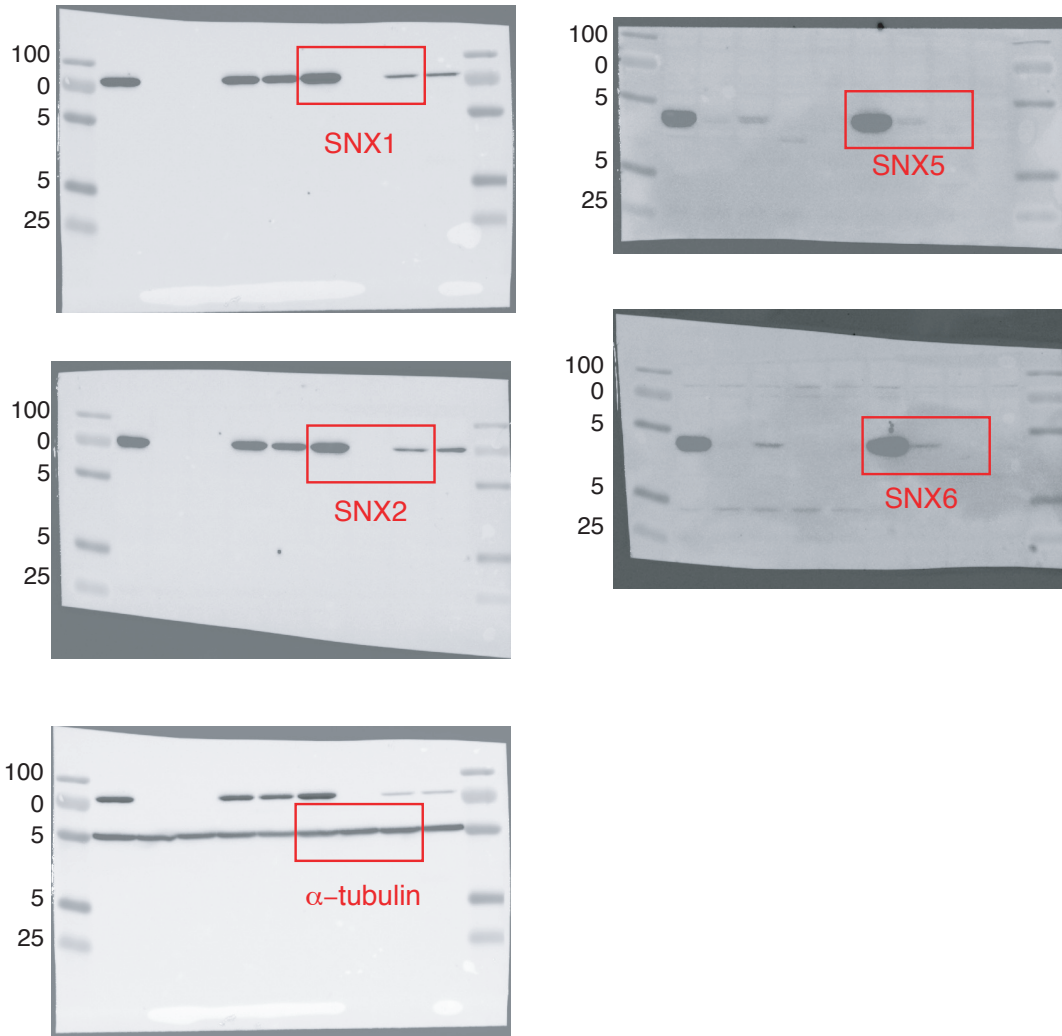

Figure 5c

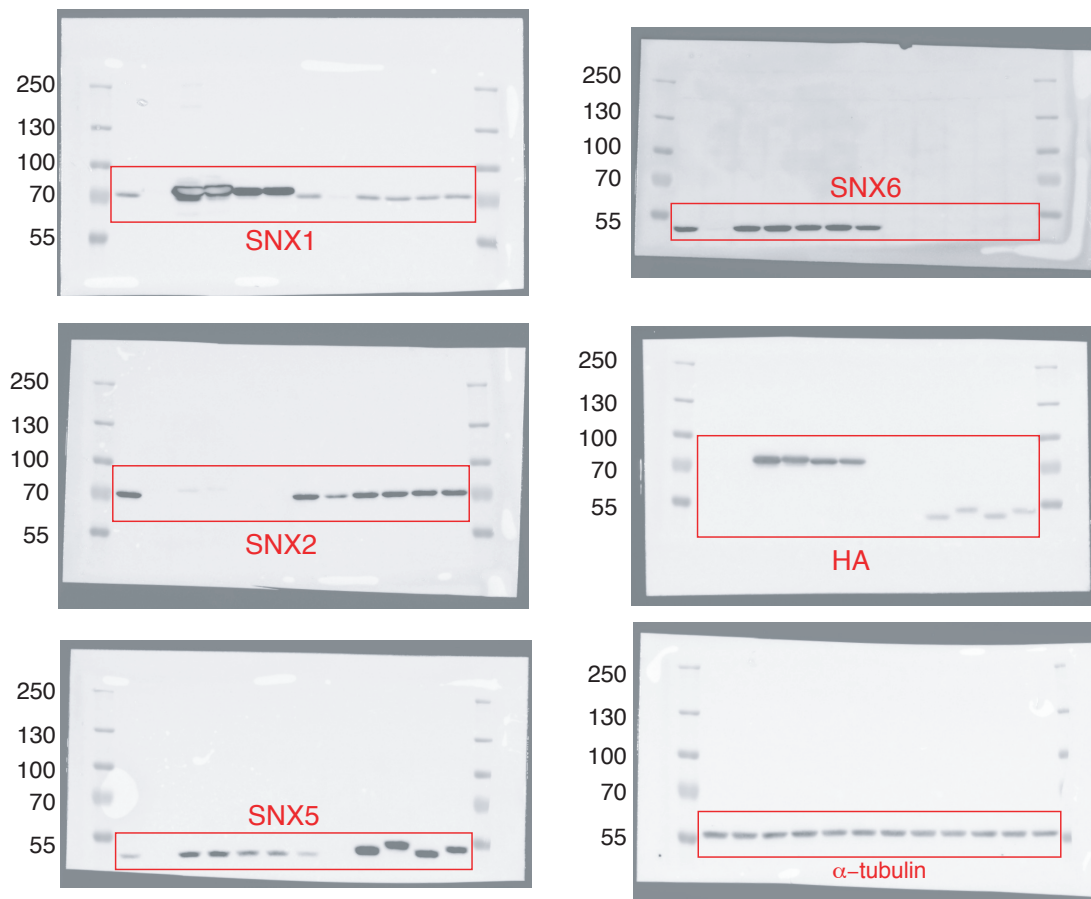

Supplement: 41594_2023_1014_MOESM8_ESM.pdf [file 41594_2023_1014_MOESM8_ESM.pdf]
