# Supplementary material for: Architecture of the ESCPE-1 membrane coat
Source: PubMed Central journal article supplement (PMC10352136; doi:10.1038/s41594-023-01014-7), 2023-06-15

### Extended Data Figure 4b

|                            |   |   |   |   |   |
|----------------------------|---|---|---|---|---|
| His-SUMO-SNX1              | + | + | - | - | - |
| His-SUMO-SNX1 <sup>†</sup> | - | - | + | + | + |
| SNX5                       | + | - | + | - | - |
| SNX5 <sup>‡</sup>          | - | - | - | - | + |
| SNX5 <sup>§</sup>          | - | + | - | + | - |

|                            |   |   |   |   |   |
|----------------------------|---|---|---|---|---|
| His-SUMO-SNX1              | + | + | - | - | - |
| His-SUMO-SNX1 <sup>†</sup> | - | - | + | + | + |
| SNX5                       | + | - | + | - | - |
| SNX5 <sup>‡</sup>          | - | - | - | - | + |
| SNX5 <sup>§</sup>          | - | + | - | + | - |

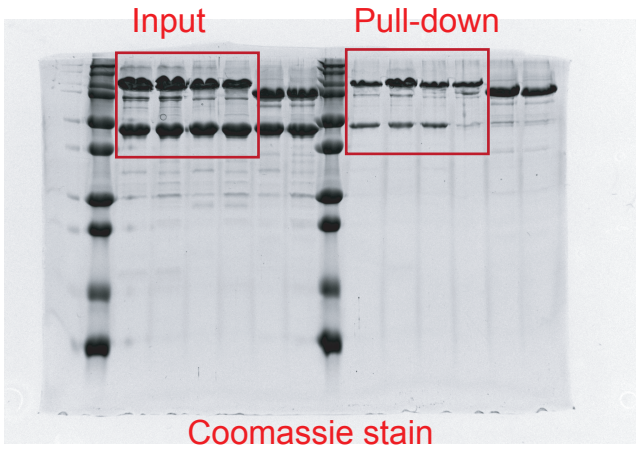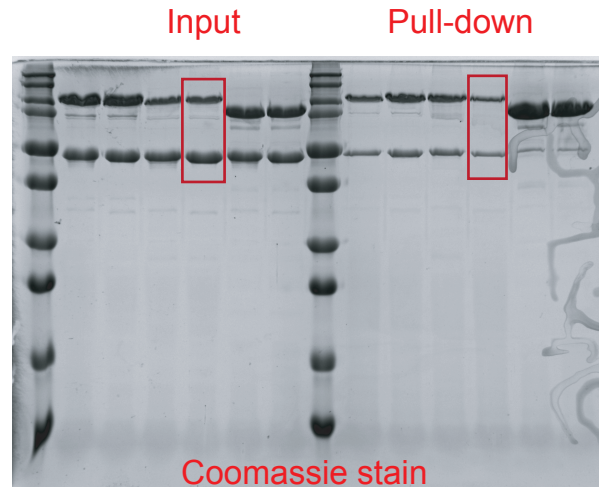

### Extended Data Figure 4c

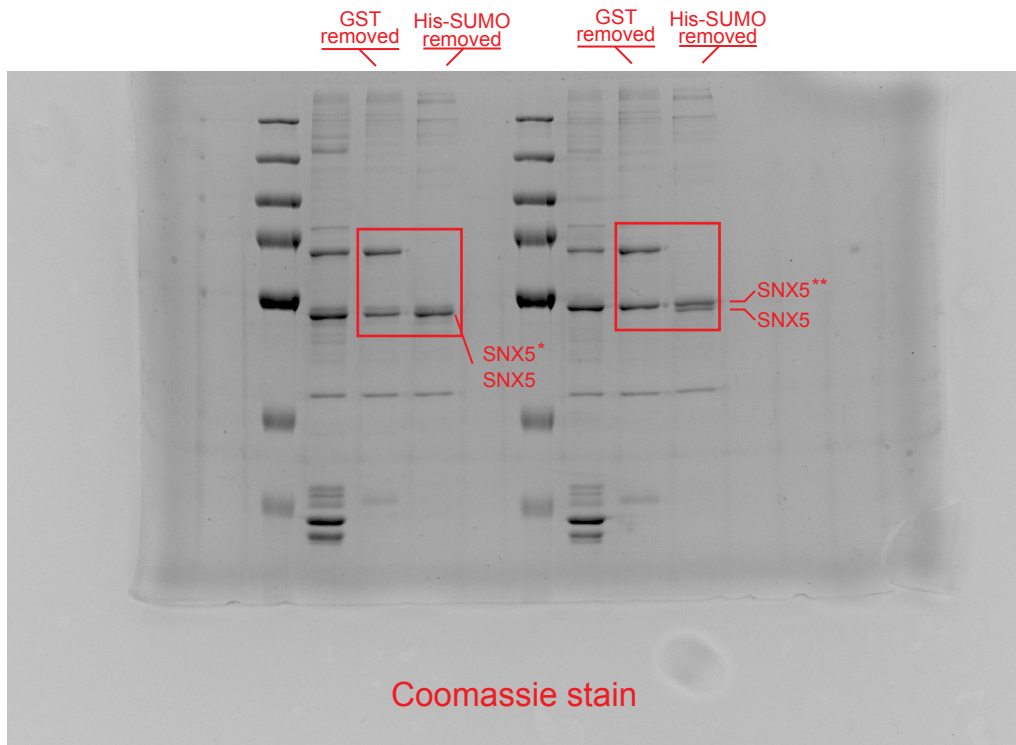

Supplement: 41594_2023_1014_MOESM11_ESM.pdf [file 41594_2023_1014_MOESM11_ESM.pdf]
